# Supplementary material for: From algae to angiosperms–inferring the phylogeny of green plants (Viridiplantae) from 360 plastid genomes
Source: PubMed Central journal article supplement (PMC3933183; doi:10.1186/1471-2148-14-23), 2014-02-17

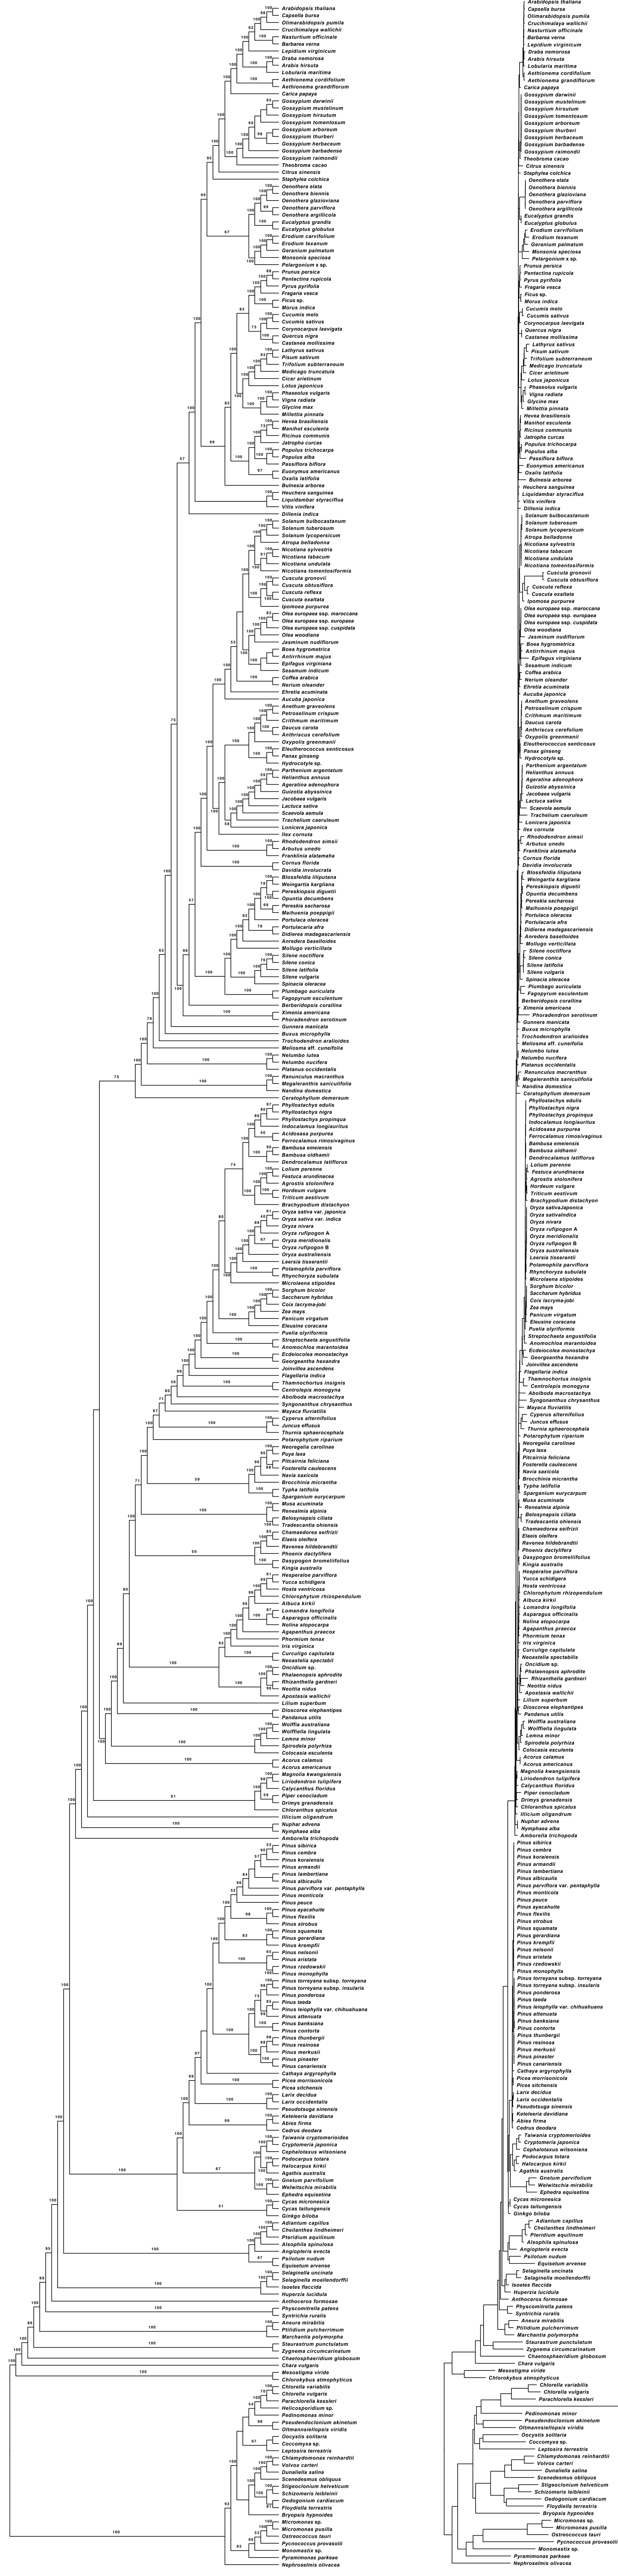

Supplement: 1471-2148-14-23-S9.pdf [file 1471-2148-14-23-S9.pdf]
